# Supplementary material
Source: PubMed Central journal article supplement (PMC8530957)
Supplement: NIHMS1737144-supplement-Supplemental_Material.pdf [file NIHMS1737144-supplement-Supplemental_Material.pdf]

## SUPPLEMENTAL MATERIAL

**Supplemental Table 1.** Sensitivity analysis of odds of heart failure medication prescription during clinic visits for patients with heart failure and a left ventricular ejection fraction  $\leq 35\%$ .

|                                                                                           | Pre-Covid vs. Covid Era OR (95%CI) | Covid In-Person vs. Covid Video | Covid In-Person vs. Covid Telephone |
|-------------------------------------------------------------------------------------------|------------------------------------|---------------------------------|-------------------------------------|
| <b>Unadjusted logistic model</b>                                                          |                                    |                                 |                                     |
| <i>Any GDMT</i>                                                                           | 0.75 (0.68-0.84)                   | 0.84 (0.66-1.07)                | 0.52 (0.42-0.65)                    |
| <i>Beta-Blocker</i>                                                                       | 0.77 (0.68-0.88)                   | 0.81 (0.60-1.09)                | 0.60 (0.46-0.77)                    |
| <i>ACE/ARB/ARNI</i>                                                                       | 0.60 (0.49-0.74)                   | 0.62 (0.35-1.08)                | 0.65 (0.43-1.00)                    |
| <i>MRA</i>                                                                                | 0.82 (0.66-1.01)                   | 0.71 (0.42-1.18)                | 0.43 (0.27-0.70)                    |
| <i>Hydralazine</i>                                                                        | 0.78 (0.49-1.24)                   | 0.24 (0.03-1.74)                | 1.17 (0.54-2.54)                    |
| <i>Nitrates</i>                                                                           | 0.98 (0.61-1.56)                   | 0.40 (0.10-1.69)                | 0.78 (0.34-1.78)                    |
| <i>Digoxin</i>                                                                            | 0.78 (0.51-1.20)                   | 0.88 (0.34-2.26)                | 0.29 (0.09-0.94)                    |
| <i>Loop Diuretics</i>                                                                     | 0.80 (0.70-0.93)                   | 0.71 (0.51-1.00)                | 0.47 (0.34-0.64)                    |
| <b>Logistic + multivariable adjustment</b>                                                |                                    |                                 |                                     |
| <i>Any GDMT</i>                                                                           | 0.81 (0.72-0.90)                   | 0.91 (0.70-1.19)                | 0.63 (0.50-0.80)                    |
| <i>Beta-Blocker</i>                                                                       | 0.83 (0.73-0.95)                   | 0.86 (0.62-1.19)                | 0.70 (0.53-0.93)                    |
| <i>ACE/ARB/ARNI</i>                                                                       | 0.58 (0.47-0.72)                   | 0.65 (0.36-1.19)                | 0.65 (0.41-1.04)                    |
| <i>MRA</i>                                                                                | 0.89 (0.71-1.11)                   | 0.78 (0.45-1.36)                | 0.60 (0.36-1.02)                    |
| <i>Hydralazine</i>                                                                        | 0.86 (0.53-1.40)                   | 0.42 (0.05-3.40)                | 1.72 (0.71-4.16)                    |
| <i>Nitrates</i>                                                                           | 0.97 (0.60-1.58)                   | 0.53 (0.12-2.39)                | 0.89 (0.36-2.24)                    |
| <i>Digoxin</i>                                                                            | 0.91 (0.58-1.41)                   | 0.81 (0.29-2.30)                | 0.32 (0.09-1.11)                    |
| <i>Loop Diuretics</i>                                                                     | 0.88 (0.76-1.02)                   | 0.84 (0.58-1.22)                | 0.56 (0.40-0.78)                    |
| <b>Logistic + multivariable adjustment + clustering by patient</b>                        |                                    |                                 |                                     |
| <i>Any GDMT</i>                                                                           | 0.80 (0.72-0.90)                   | 0.88 (0.67-1.15)                | 0.62 (0.49-0.79)                    |
| <i>Beta-Blocker</i>                                                                       | 0.83 (0.73-0.94)                   | 0.81 (0.59-1.12)                | 0.68 (0.51-0.90)                    |
| <i>ACE/ARB/ARNI</i>                                                                       | 0.58 (0.47-0.72)                   | 0.69 (0.38-1.25)                | 0.67 (0.42-1.06)                    |
| <i>MRA</i>                                                                                | 0.88 (0.71-1.10)                   | 0.74 (0.42-1.29)                | 0.58 (0.34-0.98)                    |
| <i>Hydralazine</i>                                                                        | 0.86 (0.53-1.39)                   | 0.33 (0.04-2.69)                | 1.63 (0.67-3.95)                    |
| <i>Nitrates</i>                                                                           | 0.98 (0.61-1.59)                   | 0.51 (0.11-2.30)                | 0.85 (0.34-2.14)                    |
| <i>Digoxin</i>                                                                            | 0.91 (0.59-1.42)                   | 0.90 (0.32-2.58)                | 0.33 (0.09-1.14)                    |
| <i>Loop Diuretics</i>                                                                     | 0.88 (0.76-1.02)                   | 0.83 (0.57-1.21)                | 0.56 (0.40-0.78)                    |
| <b>Logistic + multivariable adjustment + clustering by patient + propensity weighting</b> |                                    |                                 |                                     |
| <i>Any GDMT</i>                                                                           | -                                  | 0.90 (0.77-1.05)                | 0.55 (0.48-0.64)                    |
| <i>Beta-Blocker</i>                                                                       | -                                  | 0.82 (0.68-0.99)                | 0.61 (0.52-0.72)                    |
| <i>ACE/ARB/ARNI</i>                                                                       | -                                  | 0.82 (0.59-1.15)                | 0.54 (0.40-0.72)                    |
| <i>MRA</i>                                                                                | -                                  | 0.69 (0.50-0.96)                | 0.48 (0.35-0.66)                    |
| <i>Hydralazine</i>                                                                        | -                                  | 0.18 (0.04-0.90)                | 1.52 (0.89-2.61)                    |
| <i>Nitrates</i>                                                                           | -                                  | 0.29 (0.10-0.82)                | 0.65 (0.36-1.19)                    |
| <i>Digoxin</i>                                                                            | -                                  | 0.91 (0.48-1.72)                | 0.28 (0.13-0.58)                    |
| <i>Loop Diuretics</i>                                                                     | -                                  | 0.67 (0.53-0.85)                | 0.45 (0.37-0.55)                    |

|                                                            | Pre-Covid vs. Covid Era OR (95% CI) | Covid In-Person vs. Covid Video | Covid In-Person vs. Covid Telephone |
|------------------------------------------------------------|-------------------------------------|---------------------------------|-------------------------------------|
| <b>Only patients seen in both pre-Covid and Covid eras</b> |                                     |                                 |                                     |
| <i>Any GDMT</i>                                            | 0.67 (0.58-0.77)                    | 0.75 (0.60-0.94)                | 0.58 (0.48-0.70)                    |
| <i>Beta-Blocker</i>                                        | 0.72 (0.61-0.85)                    | 0.78 (0.60-1.02)                | 0.72 (0.58-0.89)                    |
| <i>ACE/ARB/ARNI</i>                                        | 0.47 (0.36-0.62)                    | 0.59 (0.35-0.97)                | 0.25 (0.15-0.42)                    |
| <i>MRA</i>                                                 | 0.79 (0.59-1.04)                    | 0.47 (0.28-0.80)                | 0.38 (0.23-0.60)                    |
| <i>Hydralazine</i>                                         | 0.97 (0.55-1.72)                    | 0.24 (0.04-1.41)                | 2.92 (1.54-5.53)                    |
| <i>Nitrates</i>                                            | 1.01 (0.56-1.81)                    | 0.33 (0.09-1.26)                | 0.82 (0.41-1.64)                    |
| <i>Digoxin</i>                                             | 0.93 (0.55-1.58)                    | 0.98 (0.46-2.08)                | 0.23 (0.09-0.58)                    |
| <i>Loop Diuretics</i>                                      | 0.79 (0.65-0.94)                    | 0.90 (0.68-1.19)                | 0.40 (0.30-0.52)                    |
| <b>Only patients seen in non-Covid-19-surge months</b>     |                                     |                                 |                                     |
| <i>Any GDMT</i>                                            | 0.83 (0.73-0.94)                    | 0.90 (0.74-1.08)                | 0.65 (0.55-0.77)                    |
| <i>Beta-Blocker</i>                                        | 0.87 (0.75-1.02)                    | 0.68 (0.54-0.86)                | 0.70 (0.57-0.85)                    |
| <i>ACE/ARB/ARNI</i>                                        | 0.61 (0.48-0.77)                    | 1.04 (0.72-1.51)                | 0.62 (0.45-0.87)                    |
| <i>MRA</i>                                                 | 0.91 (0.70-1.17)                    | 1.01 (0.71-1.44)                | 0.42 (0.27-0.64)                    |
| <i>Hydralazine</i>                                         | 0.91 (0.52-1.57)                    | 0.32 (0.06-1.70)                | 2.33 (1.22-4.44)                    |
| <i>Nitrates</i>                                            | 1.08 (0.61-1.91)                    | 0.53 (0.18-1.58)                | 0.95 (0.47-1.89)                    |
| <i>Digoxin</i>                                             | 1.18 (0.69-2.01)                    | 0.39 (0.14-1.10)                | 0.38 (0.18-0.83)                    |
| <i>Loop Diuretics</i>                                      | 0.89 (0.75-1.05)                    | 0.84 (0.65-1.09)                | 0.49 (0.38-0.62)                    |

GDMT includes evidence-based Beta Blocker, ACEi, ARB, ARNI, MRA, Hydralazine or Nitrates (if patient identified as black), or digoxin

Beta blocker = metoprolol, carvedilol, bisoprolol, or nebivolol

Nitrates = isosorbide dinitrate or isosorbide mononitrate

Multivariable adjustment adjusted for age, sex, race, insurance status, calendar date, visit length, and visit diagnoses (coronary artery disease, hypertension, atrial fibrillation/flutter, diabetes mellitus, valvular disease, and chronic kidney disease).

Propensity weighting was calculated based on propensity for being seen by remote visit according to above patient characteristics.

Non-Covid-19-surge months excluded outpatient visits during peak months of the Covid-19 pandemic in Los Angeles (June, December)

Abbreviations: GDMT = guideline directed medical therapy, ACEi = angiotensin converting enzyme inhibitor, ARB = angiotensin receptor blocker, MRA = mineralocorticoid receptor antagonist, Ref = reference
